# Supplementary material
Source: Elsevier journal article supplement (https://www.sciencedirect.com/science/article/pii/S1885585720301420)
Supplement: mmc1 [file mmc1.pdf]

**Diseccción coronaria espontánea en España: características clínicas y angiográficas, tratamiento y evolución hospitalaria**

**MATERIAL ADICIONAL**

**Centro coordinador:** Hospital Universitario de La Princesa, Madrid, España

**Core-laboratory de análisis de angiografía coronaria:** Marcos García-Guimaraes, Teresa Bastante y Fernando Alfonso, Hospital Universitario La Princesa, Madrid, España

**Centros e investigadores:**

1. Hospital Universitario de La Princesa, Madrid: Marcos García-Guimaraes, Teresa Bastante, Fernando Rivero, Fernando Alfonso.
2. Hospital Clínico San Carlos, Madrid: Fernando Macaya.
3. Hospital Universitario de Bellvitge, L'Hospitalet de Llobregat, Barcelona: Gerard Roura Ferrer.
4. Hospital General Universitario Gregorio Marañón, Madrid: Ricardo Sanz-Ruiz, Felipe Díez del Hoyo.
5. Hospital Universitario Germans Trias i Pujol, Badalona, Barcelona: Jean Christophe Barahona Alvarado.
6. Hospital del Mar, Barcelona: Helena Tizón, Beatriz Vaquerizo.
7. Complejo Hospitalario Universitario de A Coruña: Xacobe Flores Ríos.
8. Complejo Hospitalario de Toledo: José Moreu Burgos.
9. Hospital Universitario Reina Sofía, Córdoba: Soledad Ojeda Pineda.
10. Hospital Universitario de Badajoz: Juan Manuel Nogales Asensio.
11. Hospital Universitario Marqués de Valdecilla, Santander: Gabriela Veiga Fernández.
12. Hospital Clínic de Barcelona: Mónica Masotti.
13. Hospital Juan Ramón Jiménez, Huelva: Santiago Jesús Camacho Freire.
14. Hospital Universitario La Paz, Madrid: Santiago Jiménez Valero.
15. Hospital de la Santa Creu i Sant Pau, Barcelona: Marcelo Jiménez Kockar.
16. Hospital Universitario de Cabueñes, Gijón: Íñigo Lozano.
17. Hospital Clínico Universitario de Salamanca: Rocío González Ferreiro, Ignacio Cruz González.
18. Hospital Universitario 12 de Octubre, Madrid: Maite Velázquez.

19. Hospital Universitario Central de Asturias: Pablo Avanzas.
20. Complejo Asistencial Universitario de León: Cristina Lezcano Pertejo, Armando Pérez de Prado.
21. Hospital General Universitario de Ciudad Real: Fernando Lozano Ruiz-Poveda.
22. Hospital Universitario de Albacete: Juan José Portero Portaz.
23. Hospital Vall d'Hebron: Imanol Otaegui Irurueta.
24. Complejo Hospitalario Universitario de Santiago: Alfredo Redondo, Belén Cid, Ramiro Trillo.
25. Hospital Universitario Ramón y Cajal, Madrid: Rosana Hernández Antolín.
26. Hospital La Fe, Valencia: Juan José Jiménez Aguilera.
27. Hospital Clínico de Valencia: Ernesto Valero Picher.
28. Hospital Miguel Servet Zaragoza: Georgina Fuertes Ferre.
29. Hospital Universitario Puerta del Mar, Cádiz: Alejandro Gutiérrez.
30. Hospital Universitario de Málaga: Víctor M. Becerra, Antonio Domínguez Franco.
31. Fundación Jiménez Díaz: Sandra Gómez Talavera.

**Tabla 1 del material adicional.** Número de angiografías diagnósticas por centro y número de pacientes con disección coronaria espontánea incluidos en el registro en el periodo a estudio.

|              | N.º de angiografías diagnósticas | N.º de pacientes DCE |
|--------------|----------------------------------|----------------------|
| Centro 1     | 1.842                            | 2                    |
| Centro 2     | 2.650                            | 1                    |
| Centro 3     | 2.947                            | 14                   |
| Centro 4     | 3.967                            | 10                   |
| Centro 5     | 4.700                            | 4                    |
| Centro 6     | 4.784                            | 10                   |
| Centro 7     | 5.000                            | 11                   |
| Centro 8     | 5.200                            | 14                   |
| Centro 9     | 5.339                            | 4                    |
| Centro 10    | 5.465                            | 23                   |
| Centro 11    | 5.800                            | 6                    |
| Centro 12    | 6.000                            | 9                    |
| Centro 13    | 6.159                            | 5                    |
| Centro 14    | 6.480                            | 12                   |
| Centro 15    | 6.500                            | 2                    |
| Centro 16    | 6.564                            | 1                    |
| Centro 17    | 6.851                            | 5                    |
| Centro 18    | 6.985                            | 20                   |
| Centro 19    | 7.190                            | 6                    |
| Centro 20    | 7.226                            | 17                   |
| Centro 21    | 7.441                            | 11                   |
| Centro 22    | 7.531                            | 29                   |
| Centro 23    | 7.600                            | 10                   |
| Centro 24    | 7.734                            | 16                   |
| Centro 25    | 8.690                            | 9                    |
| Centro 26    | 9.359                            | 11                   |
| Centro 27    | 10.357                           | 5                    |
| Centro 28    | 11.009                           | 4                    |
| Centro 29    | 12.766                           | 25                   |
| Centro 30    | 13.289                           | 2                    |
| Centro 31    | 13.472                           | 20                   |
| <b>Total</b> | <b>216.897</b>                   | <b>318</b>           |

DCE: disección coronaria espontánea.

**Tabla 2 del material adicional.** Motivo principal para la selección del intervencionismo coronario percutáneo como estrategia inicial.

|                                       | N = 70  |
|---------------------------------------|---------|
| Isquemia en curso                     | 21 (30) |
| Flujo TIMI 0-1 inicial                | 26 (37) |
| Afectación TCI o segmentos proximales | 13 (19) |
| Inestabilidad hemodinámica            | 4 (6)   |
| Inestabilidad eléctrica               | 1 (1)   |
| Disección iatrogénica con catéter     | 5 (7)   |

TIMI: *Thrombolysis in Myocardial Infarction*; TCI: tronco coronario izquierdo.

Los datos expresan n (%).
